# Supplementary material for: Knowledge towards Cervical and Breast Cancers among Industrial Workers: Results from a Multisite Study in Northern Vietnam
Source: Int J Environ Res Public Health. 2019 Nov 5;16(21):4301. doi: 10.3390/ijerph16214301 (PMC6862634; doi:10.3390/ijerph16214301)
Supplement: Supplementary file 1 [file ijerph-16-04301-s001.pdf]

## SURVEY OF HEALTH STATUS OF WORKERS OF INDUSTRIAL ZONES

| A  | GENERAL INFORMATION                                       |                                                                                                                                                                                                                                                                                                                                                                                                                                                                                                                                                                                   |
|----|-----------------------------------------------------------|-----------------------------------------------------------------------------------------------------------------------------------------------------------------------------------------------------------------------------------------------------------------------------------------------------------------------------------------------------------------------------------------------------------------------------------------------------------------------------------------------------------------------------------------------------------------------------------|
| A1 | The name of the company you are currently working at      |                                                                                                                                                                                                                                                                                                                                                                                                                                                                                                                                                                                   |
| A3 | Year of birth?                                            |                                                                                                                                                                                                                                                                                                                                                                                                                                                                                                                                                                                   |
| A4 | What is your gender?                                      | <div style="text-align: right; padding-right: 10px;">Male 1</div> <div style="text-align: right; padding-right: 10px;">Female 2</div>                                                                                                                                                                                                                                                                                                                                                                                                                                             |
| A5 | What is your highest educational level?                   | <div style="text-align: right; padding-right: 10px;">Do not go to school 1</div> <div style="text-align: right; padding-right: 10px;">Primary school 2</div> <div style="text-align: right; padding-right: 10px;">Junior high school 3</div> <div style="text-align: right; padding-right: 10px;">High school 4</div> <div style="text-align: right; padding-right: 10px;">Intermediate, college, vocational training 5</div> <div style="text-align: right; padding-right: 10px;">University 6</div> <div style="text-align: right; padding-right: 10px;">Post-graduated 7</div> |
| A6 | What is your marital status?                              | <div style="text-align: right; padding-right: 10px;">Single 1</div> <div style="text-align: right; padding-right: 10px;">Live with spouse 2</div> <div style="text-align: right; padding-right: 10px;">Living as a spouse, unmarried 3</div> <div style="text-align: right; padding-right: 10px;">Divorced / Separated 4</div> <div style="text-align: right; padding-right: 10px;">Widow 5</div>                                                                                                                                                                                 |
| A7 | How many children do you have?                            | ..... children                                                                                                                                                                                                                                                                                                                                                                                                                                                                                                                                                                    |
| A8 | Are you a immigrants?                                     | <div style="text-align: right; padding-right: 10px;">Local people 1</div> <div style="text-align: right; padding-right: 10px;">Immigrant 2</div>                                                                                                                                                                                                                                                                                                                                                                                                                                  |
| A9 | For the past 1 year, your average monthly personal income | .....VND                                                                                                                                                                                                                                                                                                                                                                                                                                                                                                                                                                          |
| B  | WORKING STATUS                                            |                                                                                                                                                                                                                                                                                                                                                                                                                                                                                                                                                                                   |
| B1 | How long have you worked in here                          | <div style="text-align: right; padding-right: 10px;">..... Year</div> <div style="text-align: right; padding-right: 10px;">..... month</div>                                                                                                                                                                                                                                                                                                                                                                                                                                      |
| B2 | How many working hours per day?                           | ..... Hour                                                                                                                                                                                                                                                                                                                                                                                                                                                                                                                                                                        |

| C  | HEALTH STATUS                                                                      |                |
|----|------------------------------------------------------------------------------------|----------------|
| C1 | DO you have any health problems (illnesses or symptoms)? (Choose multiple answers) |                |
|    | High blood pressure                                                                | 1              |
|    | Heart                                                                              | 2              |
|    | Diabetes                                                                           | 3              |
|    | Asthma                                                                             | 4              |
|    | Stomach / digestive                                                                | 5              |
|    | Chronic obstructive pulmonary                                                      | 6              |
|    | Allergy                                                                            | 7              |
|    | Dermatology                                                                        | 8              |
|    | Ear / hearing diseases                                                             | 9              |
|    | Lumbar spine pain / Cervical spine pain                                            | 10             |
|    | Osteoarthritis pain                                                                | 11             |
|    | Headache                                                                           | 12             |
|    | Shortness of breath                                                                | 13             |
|    | Other:.....                                                                        | 14             |
|    | There is no disease / disability                                                   | 99             |
| C2 | Recently, how often do you drink alcohol?                                          |                |
|    | Never                                                                              | 1              |
|    | Monthly                                                                            | 2              |
|    | Weekly                                                                             | 3              |
|    | 2-3 times per week                                                                 | 4              |
|    | > = 4 times per week                                                               | 5              |
| C3 | Normally, how many cups / glass do you usually drink each time?                    | .....cup/glass |
| C4 | How often do you drink 6 or more cups of alcohol?                                  |                |
|    | Never                                                                              | 1              |
|    | Every few months                                                                   | 2              |

|    |                                                                                                                                    |                                     |                         |
|----|------------------------------------------------------------------------------------------------------------------------------------|-------------------------------------|-------------------------|
|    |                                                                                                                                    | Monthly<br>Weekly<br>Daily          | 3<br>4<br>5             |
| C5 | Have you ever smoked a total of 100 cigarettes or more? (100 cigarettes = 5 packs of cigarettes) ?                                 | Yes<br>Is not<br>Do not know        | 1<br>2<br>99            |
| C6 | In the past 30 days, did you smoke?                                                                                                | Yes<br>No                           | 1<br>2                  |
| C7 | In the last 12 months, how many partners did you have sex with (your spouse / lover / partner) paid / your partner received money? | Do not remmenber<br>Do not have sex | .....people<br>98<br>99 |

| D  | HEALTH SERVICE UTILIZATION                                                                                                                                                                                                                                                                 |                                                                     |
|----|--------------------------------------------------------------------------------------------------------------------------------------------------------------------------------------------------------------------------------------------------------------------------------------------|---------------------------------------------------------------------|
| D1 | In the past 12 months, did you or do you have regular checkups?<br><div>Yes<br/>No</div>                                                                                                                                                                                                   | <div>1<br/>2</div>                                                  |
| D2 | In the past 12 months, have you ever used counseling and reproductive health care services?<br><div>Yes<br/>No</div>                                                                                                                                                                       | <div>1<br/>2</div>                                                  |
| D3 | How do you usually access health information? (Choose multiple answers)<br><div>Friends / relatives<br/>Posters / banner<br/>Internet<br/>Text message<br/>Radio and television<br/>Loudspeaker<br/>Newspapers, books<br/>Medical staff<br/>Social Network<br/>Other (specify) .....</div> | <div>1<br/>2<br/>3<br/>4<br/>5<br/>6<br/>7<br/>8<br/>9<br/>10</div> |

| E  | KNOWLEDGE                                                                 |                                                                                                                                                                                                                                                                                           |                                      |
|----|---------------------------------------------------------------------------|-------------------------------------------------------------------------------------------------------------------------------------------------------------------------------------------------------------------------------------------------------------------------------------------|--------------------------------------|
| E1 | What causes breast cancer? (Choose multiple answers)                      | Do not breastfeed<br>Genetic<br>Pollution of dust and chemicals<br>Smoke<br>Blocked breast milk<br>Unknown / Unknown                                                                                                                                                                      | 1<br>2<br>3<br>4<br>5<br>6           |
| E2 | What are the warning signs of breast cancer? (Choose multiple answers)    | Feeling a lump in the breast<br>Breast enlargement or changes in breast shape<br>Swollen lymph nodes<br>One of the nipples is dimpled or shaggy<br>Skin of the breast is thicker, wrinkled<br>or change color, grainy like orange peel<br>Pus oozing from the nipple<br>Unknown / Unknown | 1<br>2<br>3<br>4<br>5<br>6<br>7<br>8 |
| E3 | What are the breast cancer prevention measures? (Choose multiple answers) | Screening and diagnosis of breast cancer early and periodically<br>Grow kids by mom milk<br>Diet<br>Exercise regularly<br>Do not drink alcohol<br>No smoking<br>Unknown / Unknown                                                                                                         | 1<br>2<br>3<br>4<br>5<br>6<br>7      |
| E4 | What causes cervical cancer? (Choose multiple answers)                    |                                                                                                                                                                                                                                                                                           |                                      |

|           |                                                                                                                                                                                                                                                                                                 |                                 |
|-----------|-------------------------------------------------------------------------------------------------------------------------------------------------------------------------------------------------------------------------------------------------------------------------------------------------|---------------------------------|
|           | Inflammation of the genital tract<br>Having sex with many people<br>Having sex early<br>Spawning a lot<br>Smoke<br>Unknown / Unknown                                                                                                                                                            | 1<br>2<br>3<br>4<br>5<br>6      |
| <b>E5</b> | <b>Signs of cervical cancer? (Choose multiple answers)</b><br>Vaginal bleeding after sex<br>Any bleeding between menstrual periods<br>Vaginal discharge<br>Pain during sex<br>Pelvic pain,<br>Heavy bleeding during menstruation<br>Unknown / Unknown                                           | 1<br>2<br>3<br>4<br>5<br>6<br>7 |
| <b>E6</b> | <b>Measures to prevent cervical cancer? (Choose multiple answers)</b><br>Periodic gynecological examination and treatment of gynecological diseases (if any)<br>Vaccination<br>Do not have sex with many people<br>Do not have sex early<br>Other:.....<br>Not preventable<br>Unknown / Unknown | 1<br>2<br>3<br>4<br>5<br>6<br>7 |

**PLEASE THANK YOU FOR YOUR PARTICIPATION!**
